# Supplementary material for: The CTCF/LncRNA‐PACERR complex recruits E1A binding protein p300 to induce pro‐tumour macrophages in pancreatic ductal adenocarcinoma via directly regulating PTGS2 expression
Source: PubMed Central journal article supplement (PMC8858628; doi:10.1002/ctm2.654), 2022-02-20
Supplement: CTM2-12-e654-s003.pdf [file CTM2-12-e654-s003.pdf]

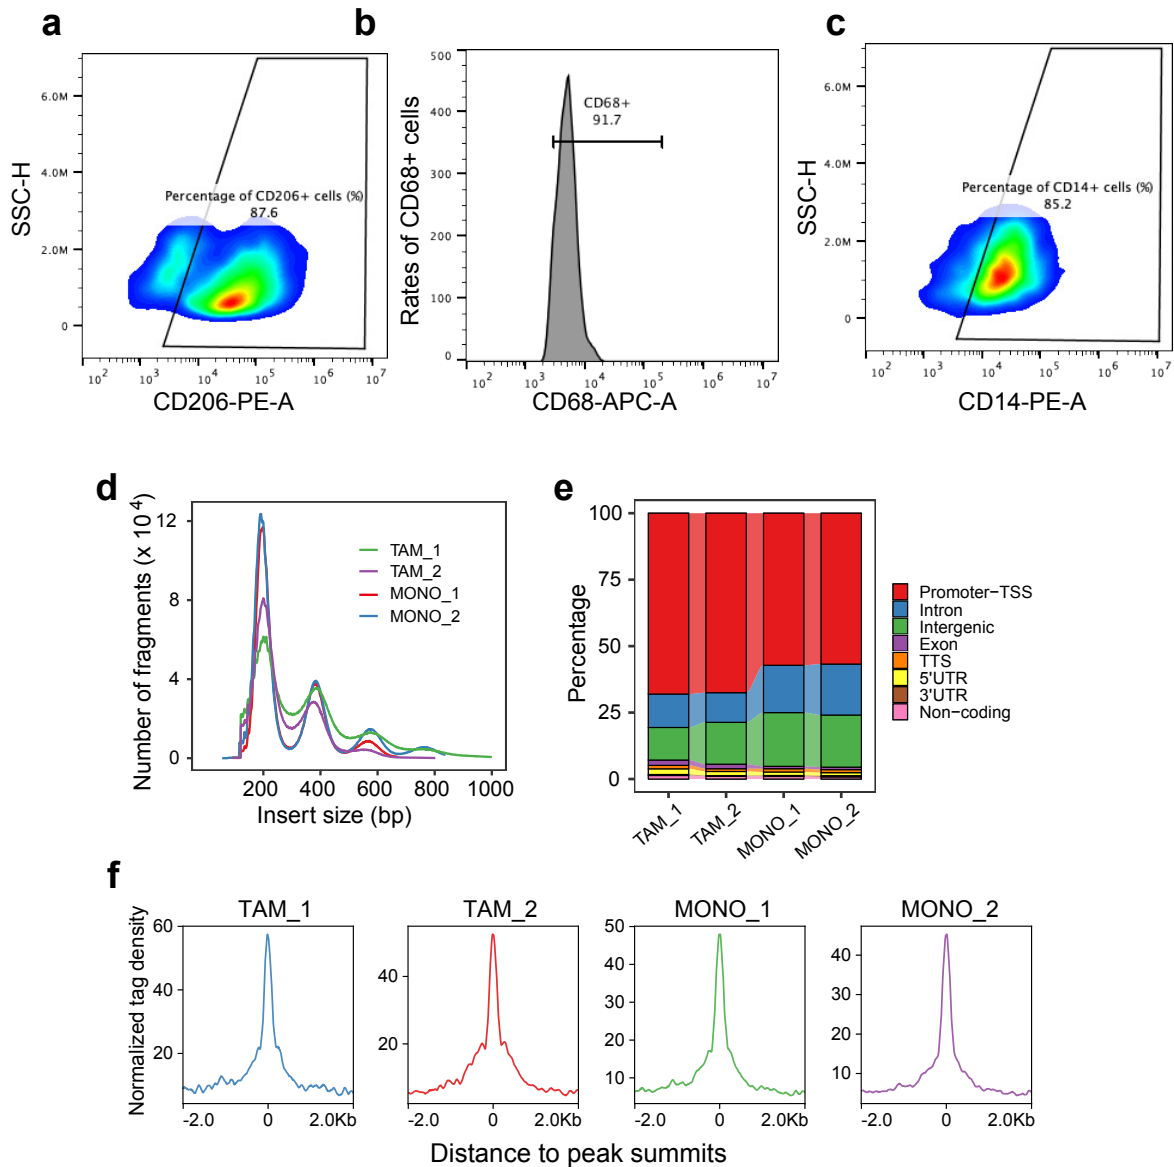

**Figure S1**

chr16: 67642903-67677110

No. of reads

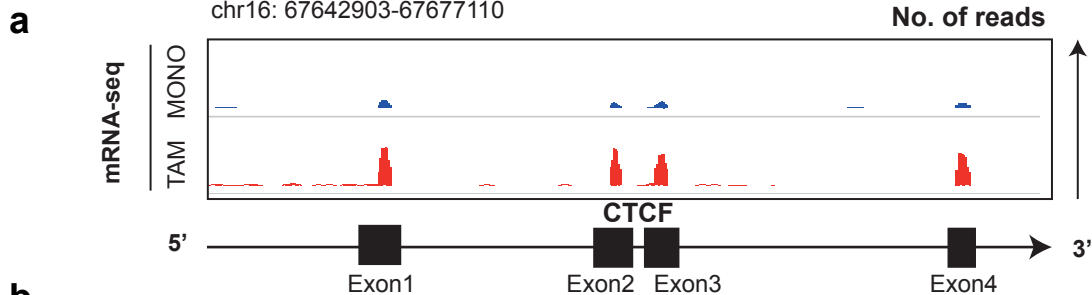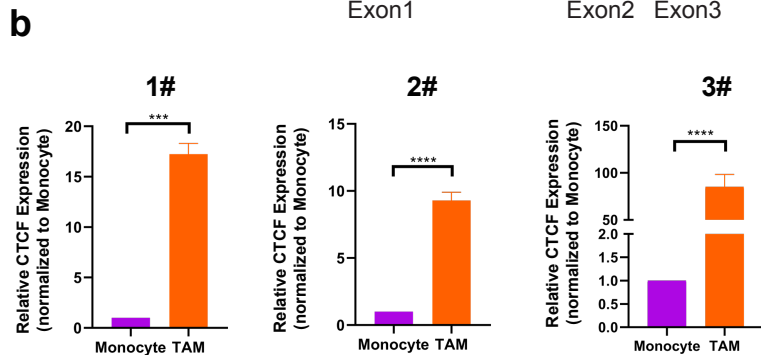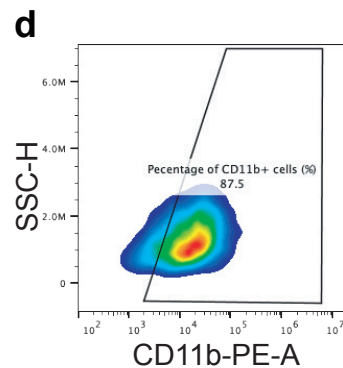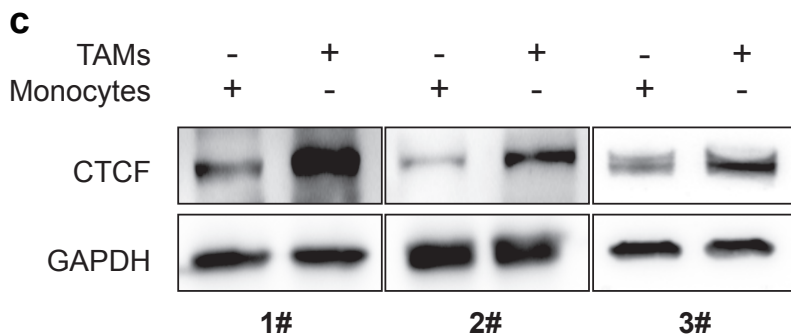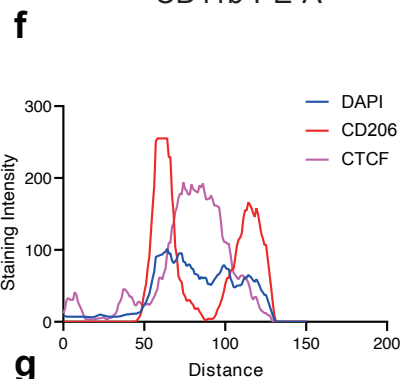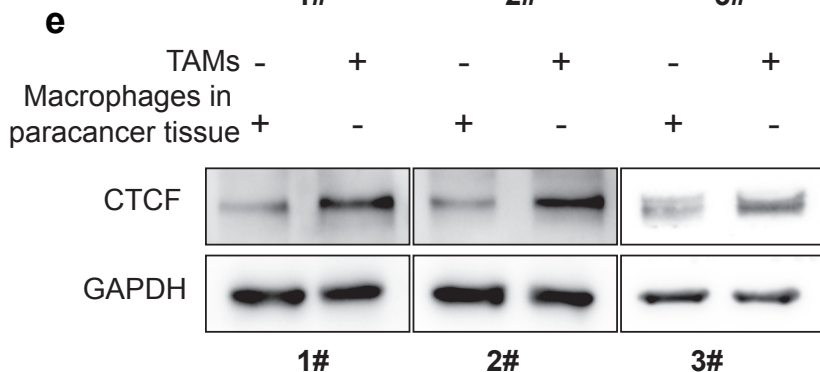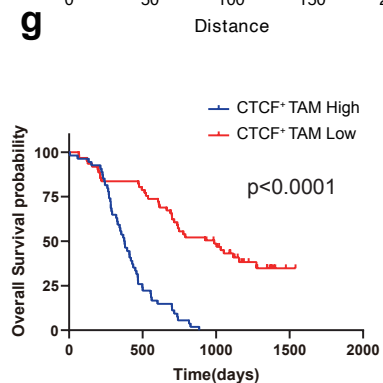

Figure S2

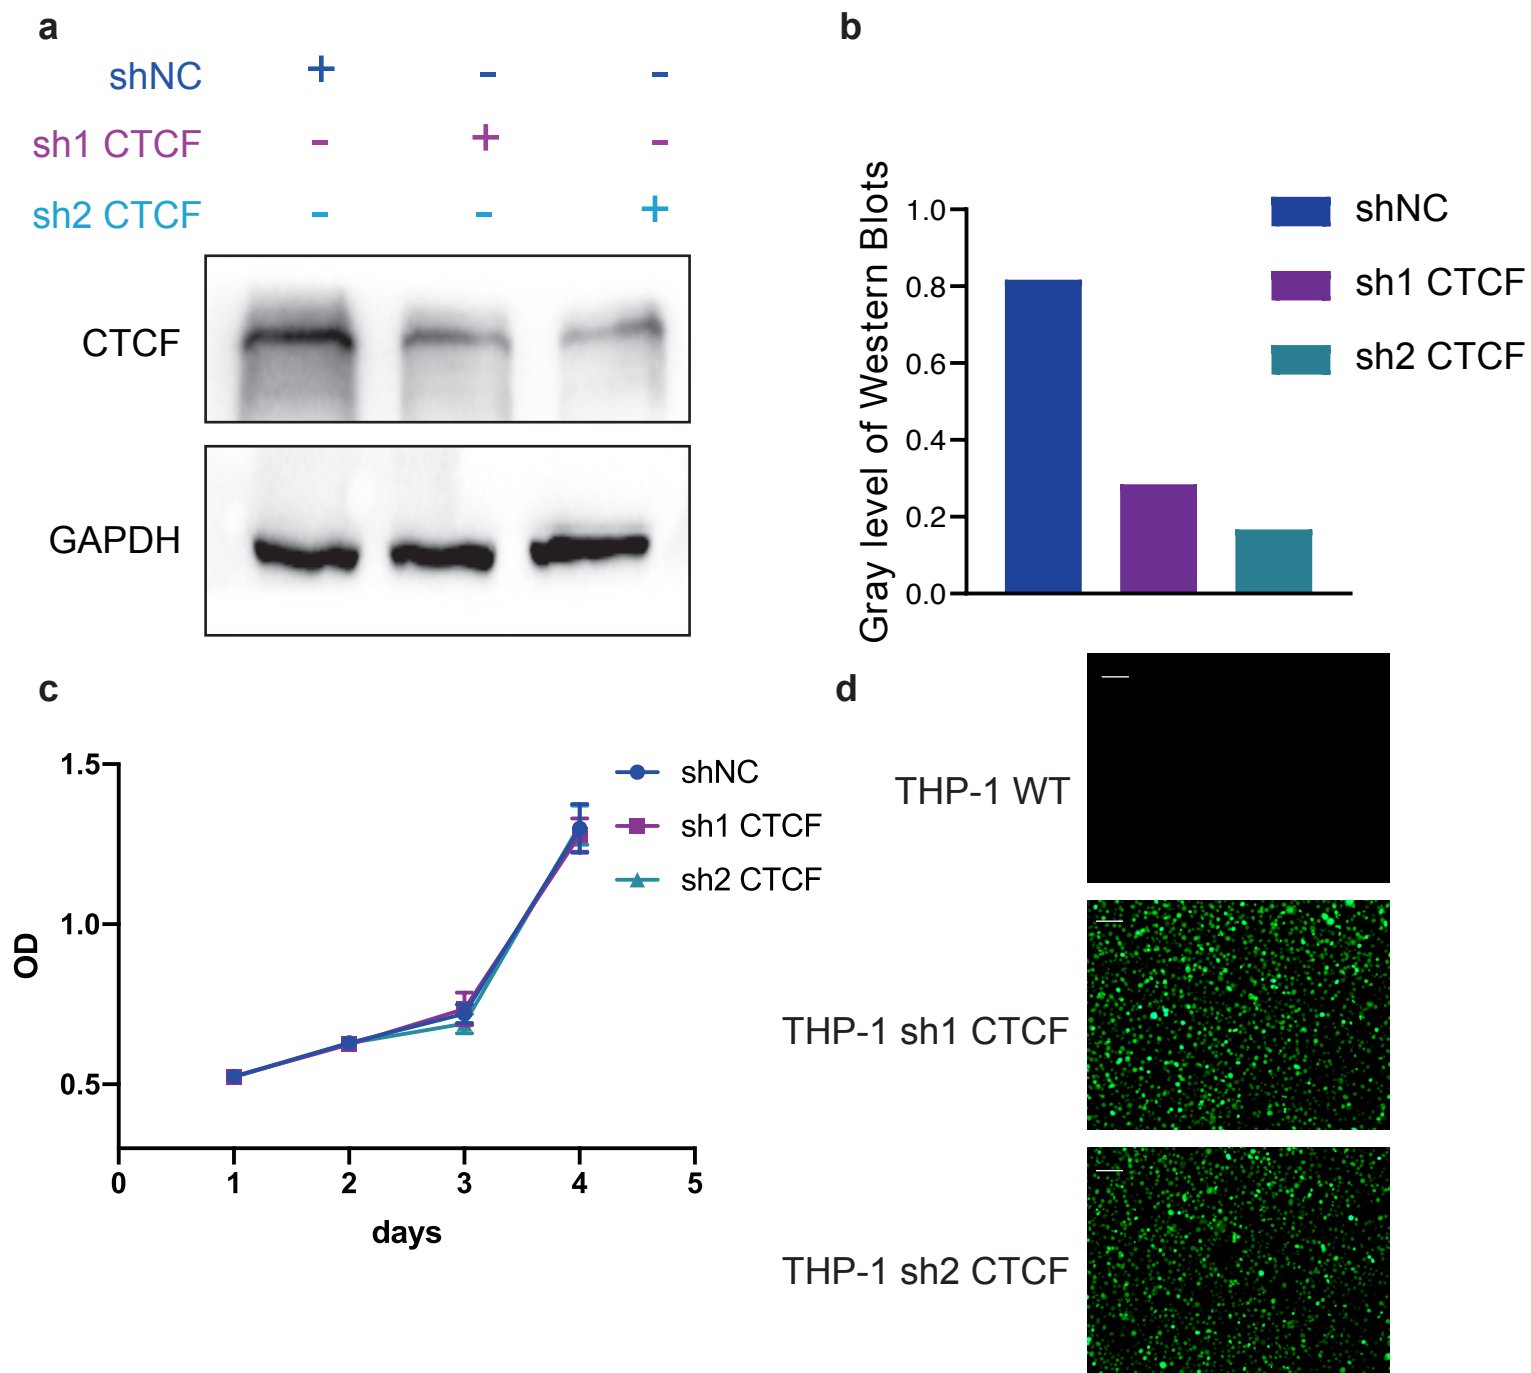

**Figure S3**

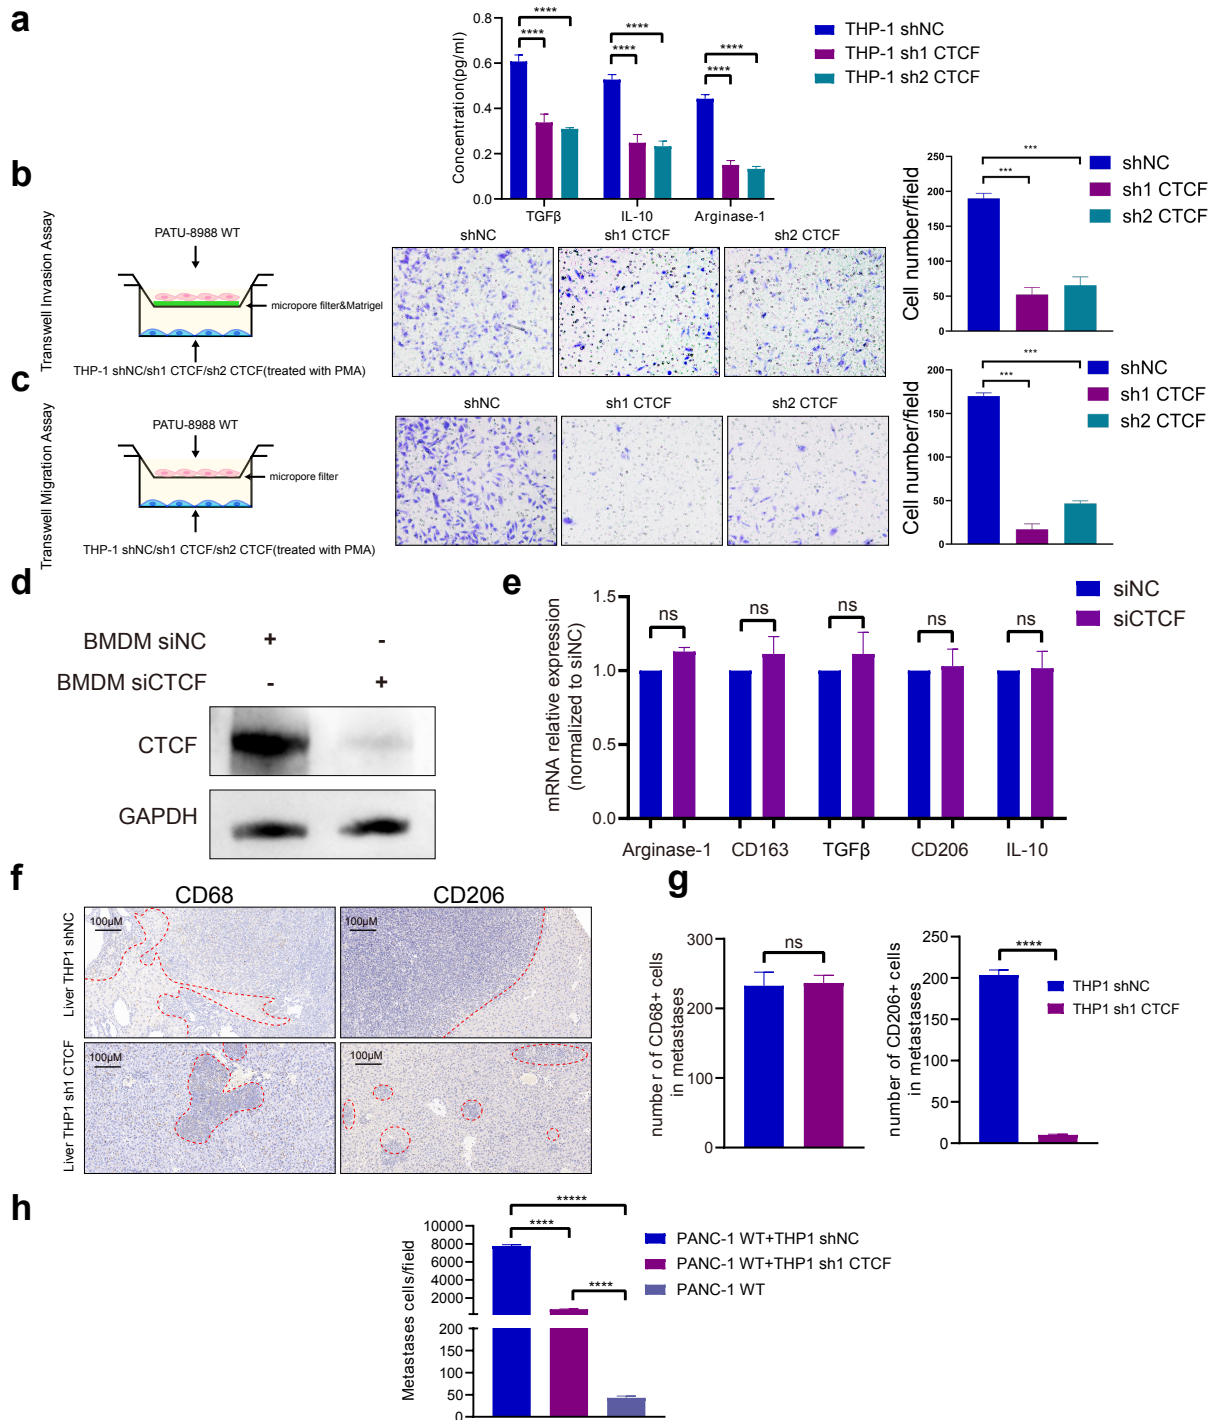

**Figure S4**

**a**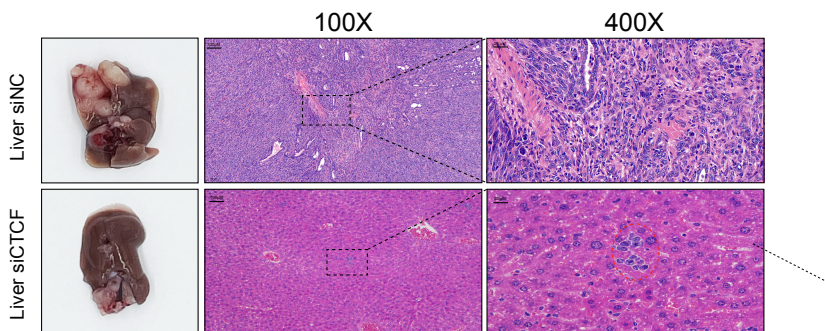**b**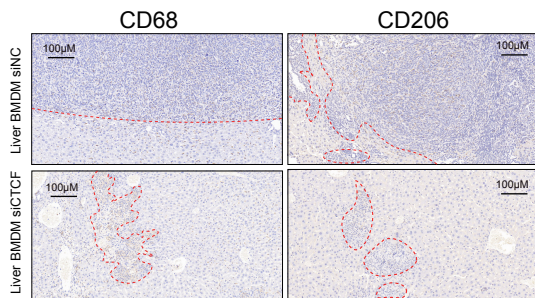**c**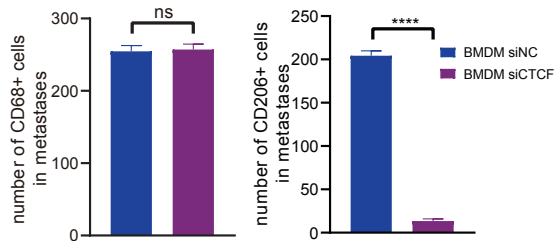**Figure S5**

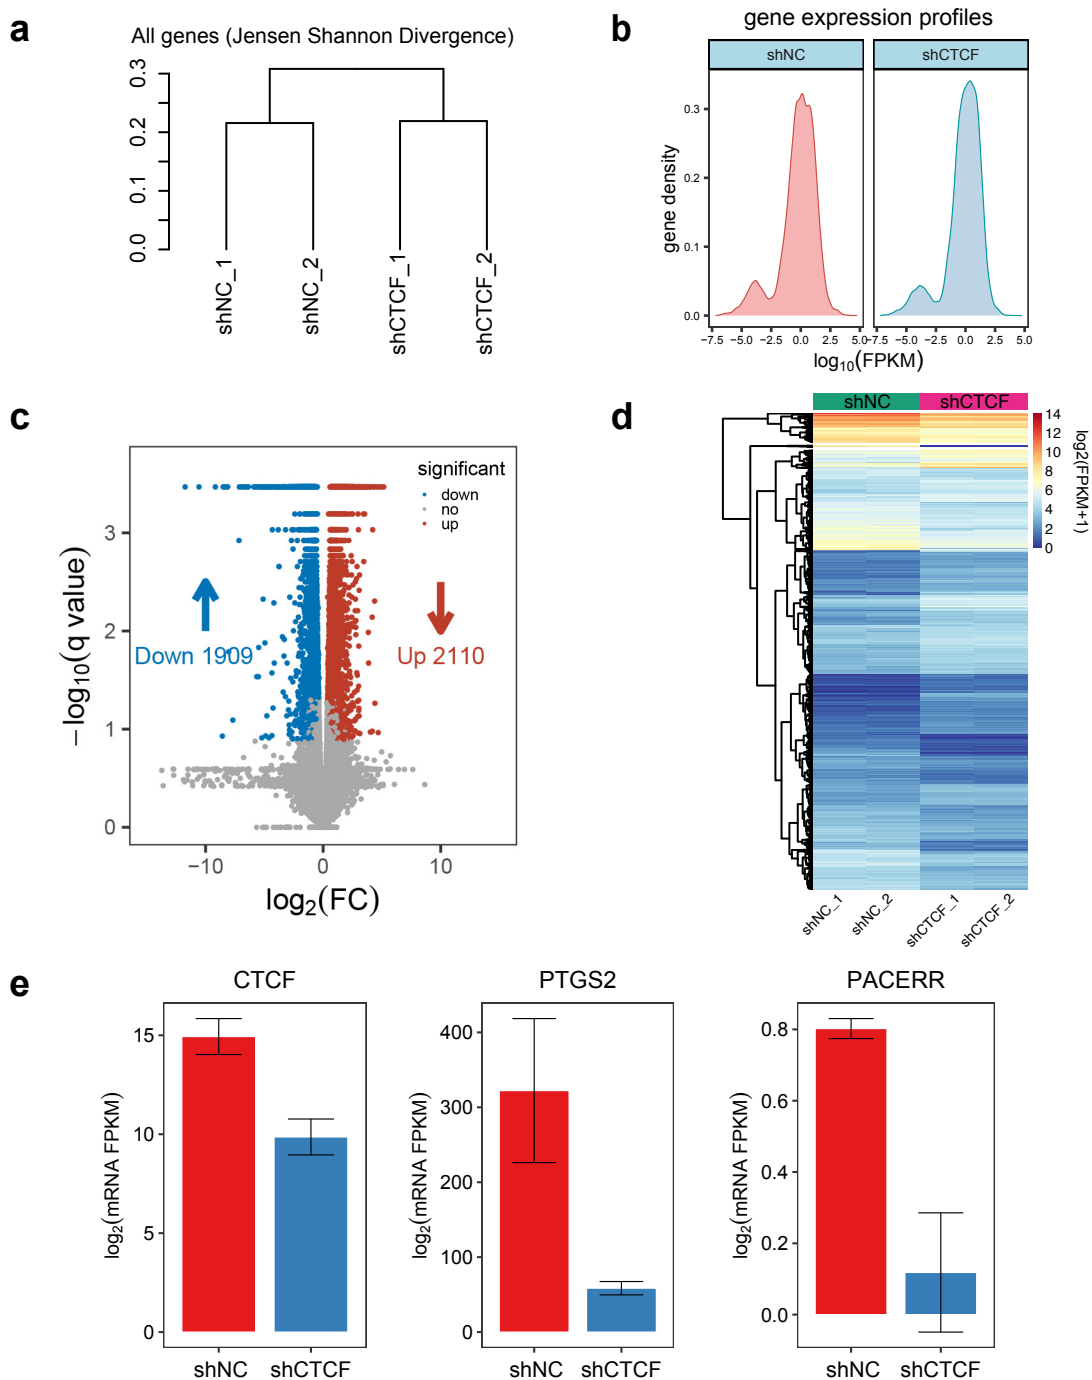

**Figure S6**

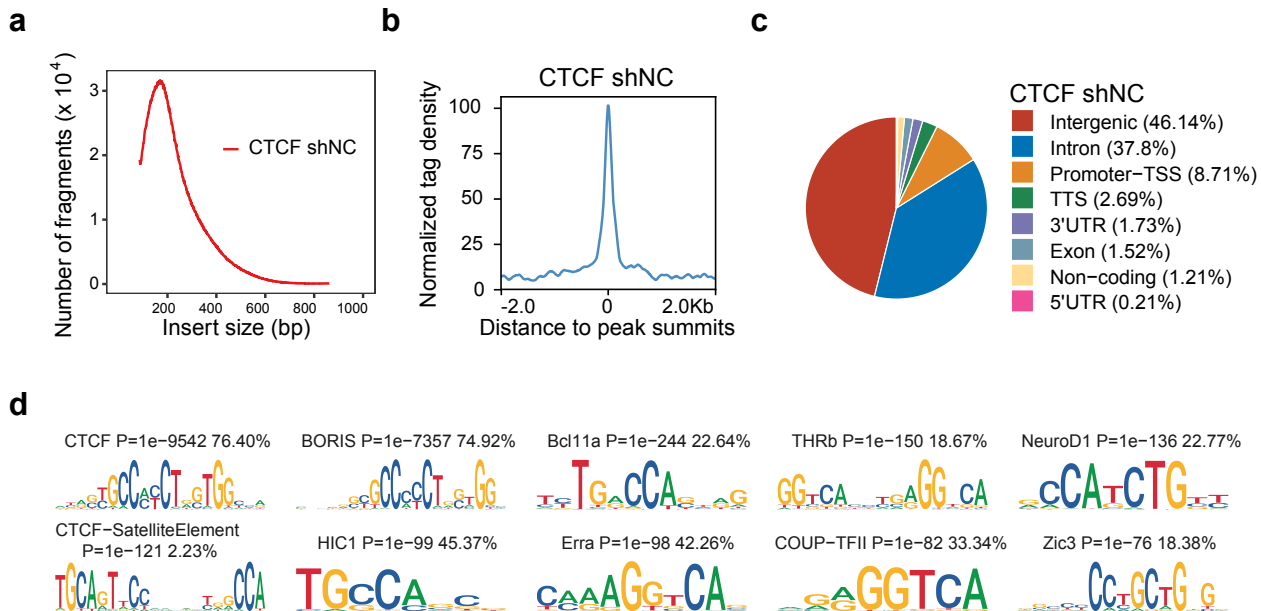

**Figure S7**

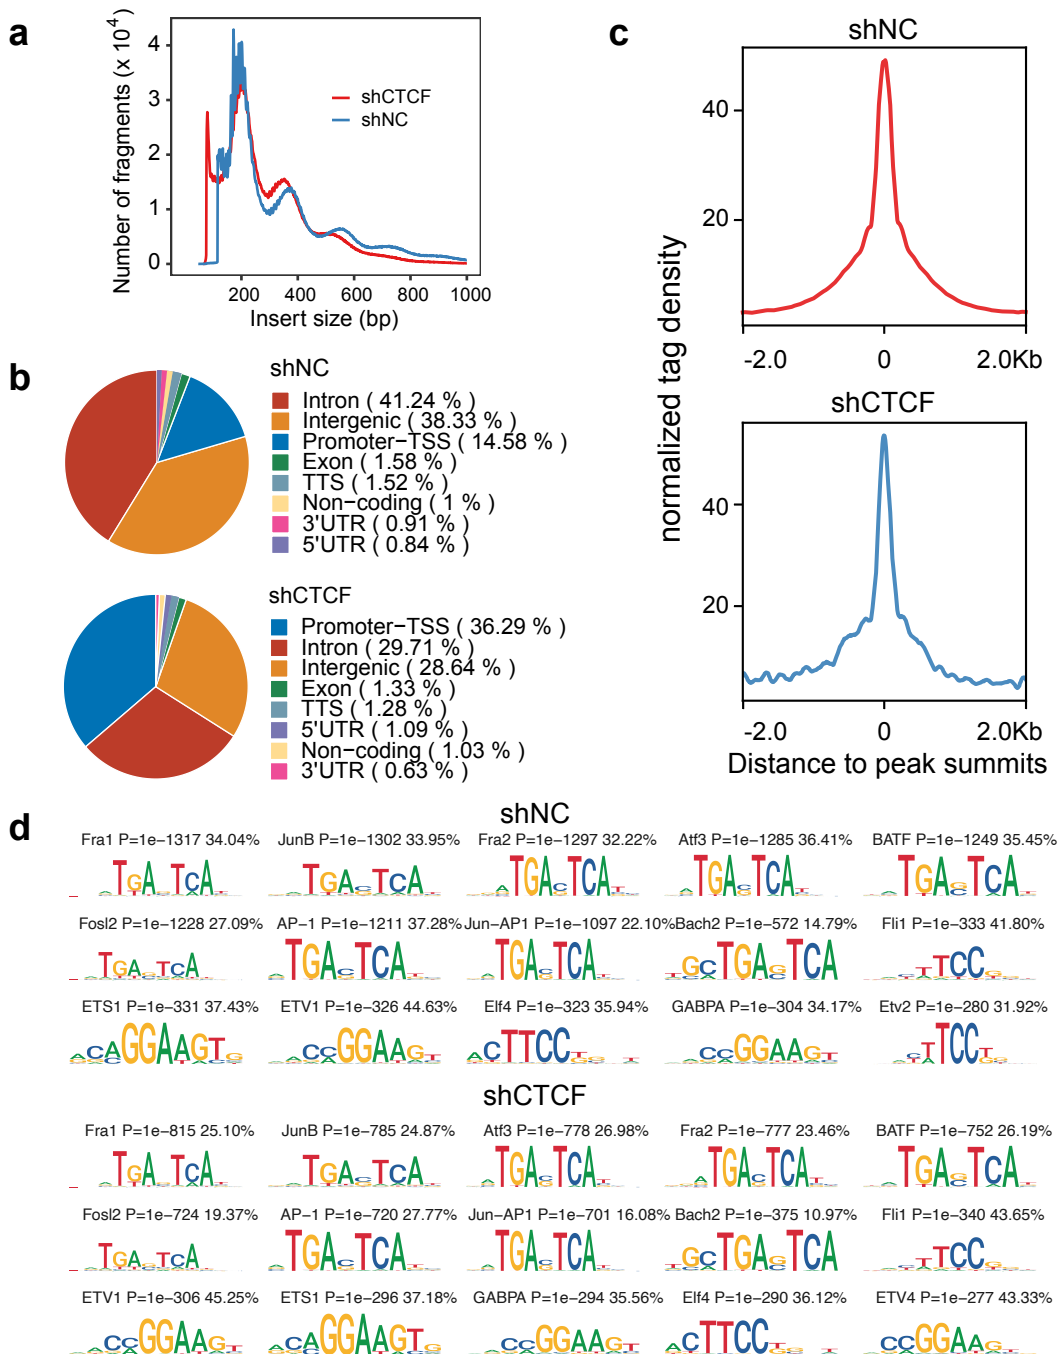

**Figure S8**



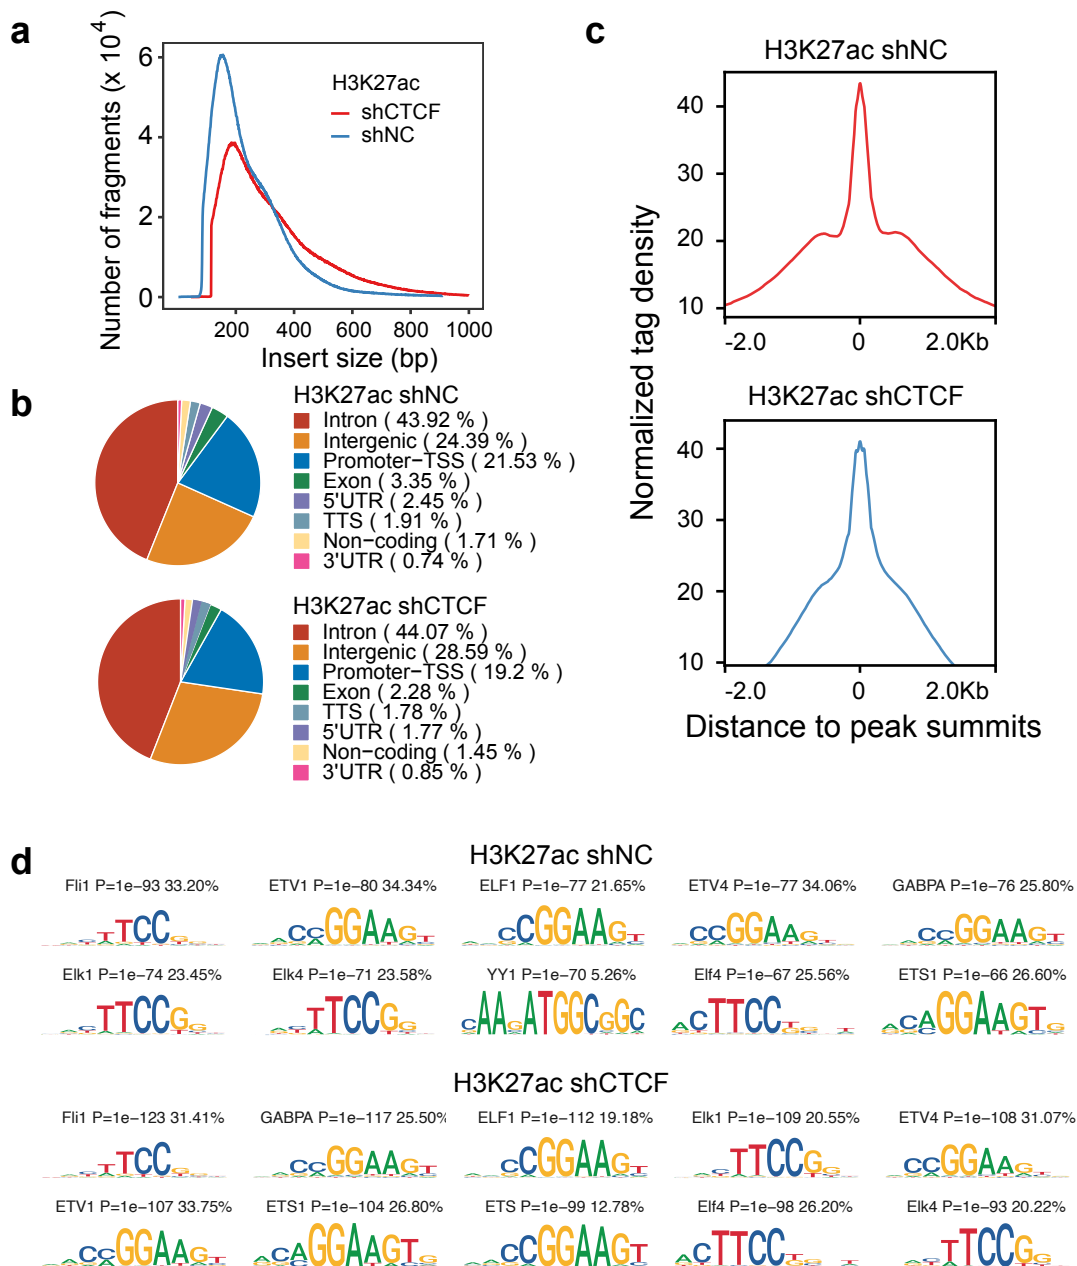

**Figure S9**

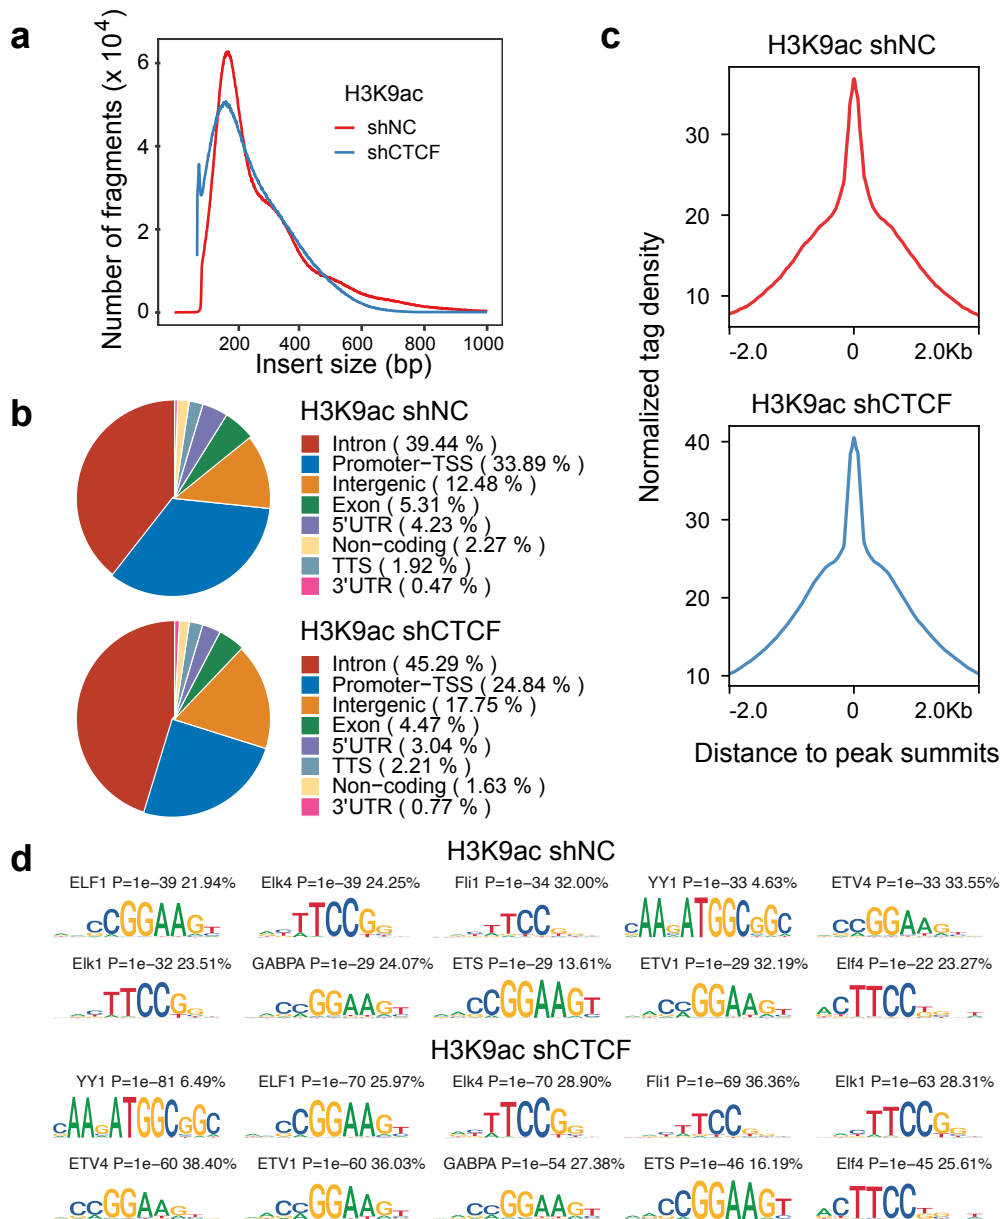

**Figure S10**

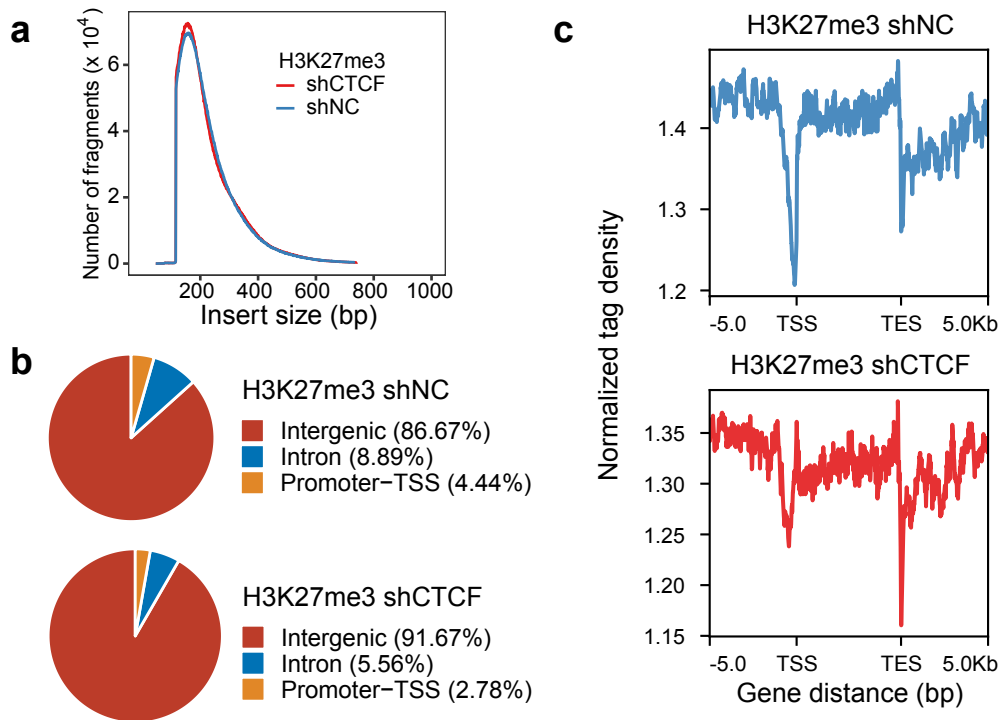

**Figure S11**

**a**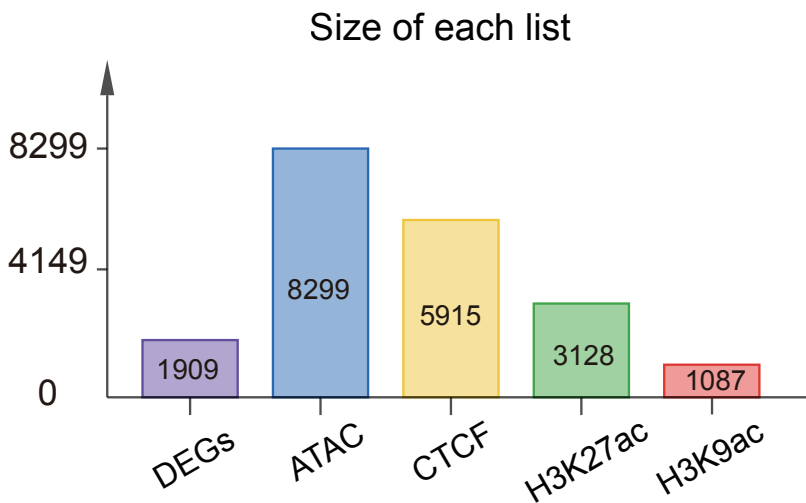**b**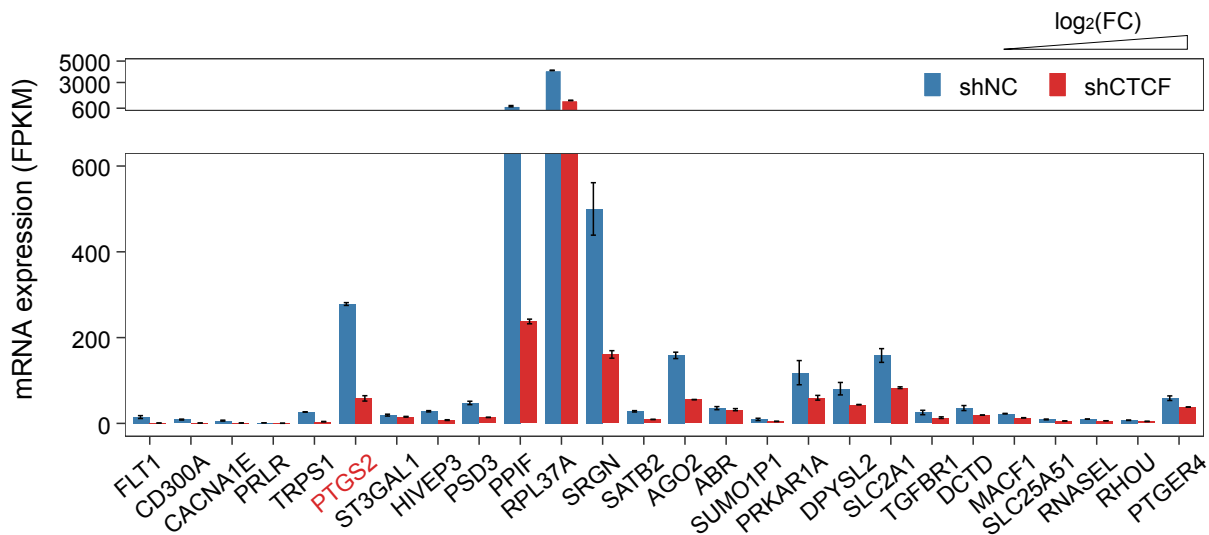**Figure S12**

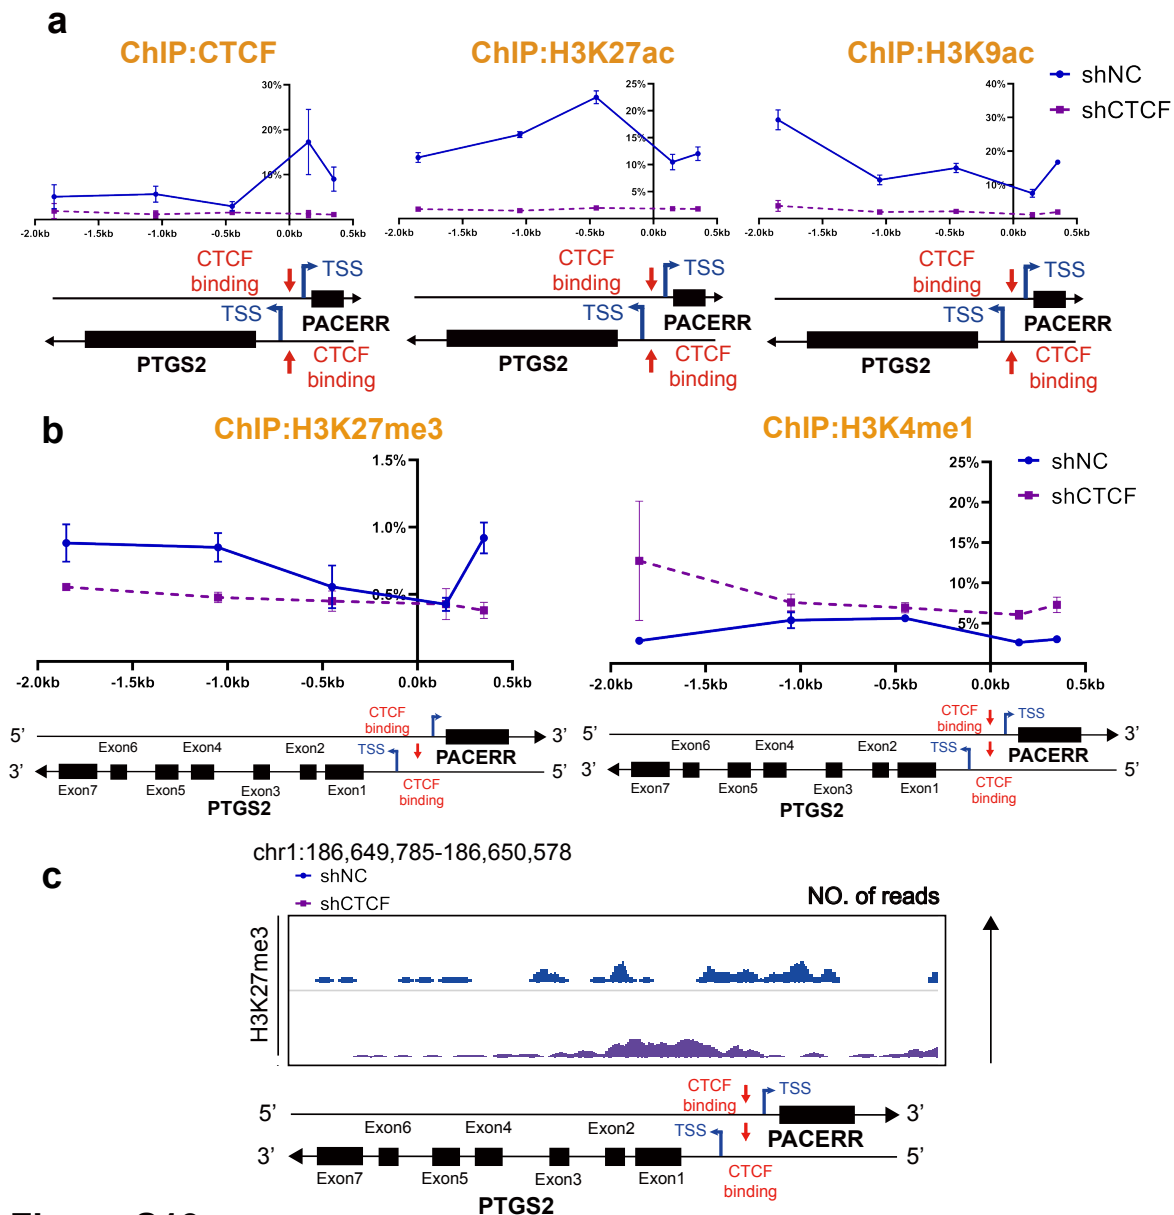

**Figure S13**

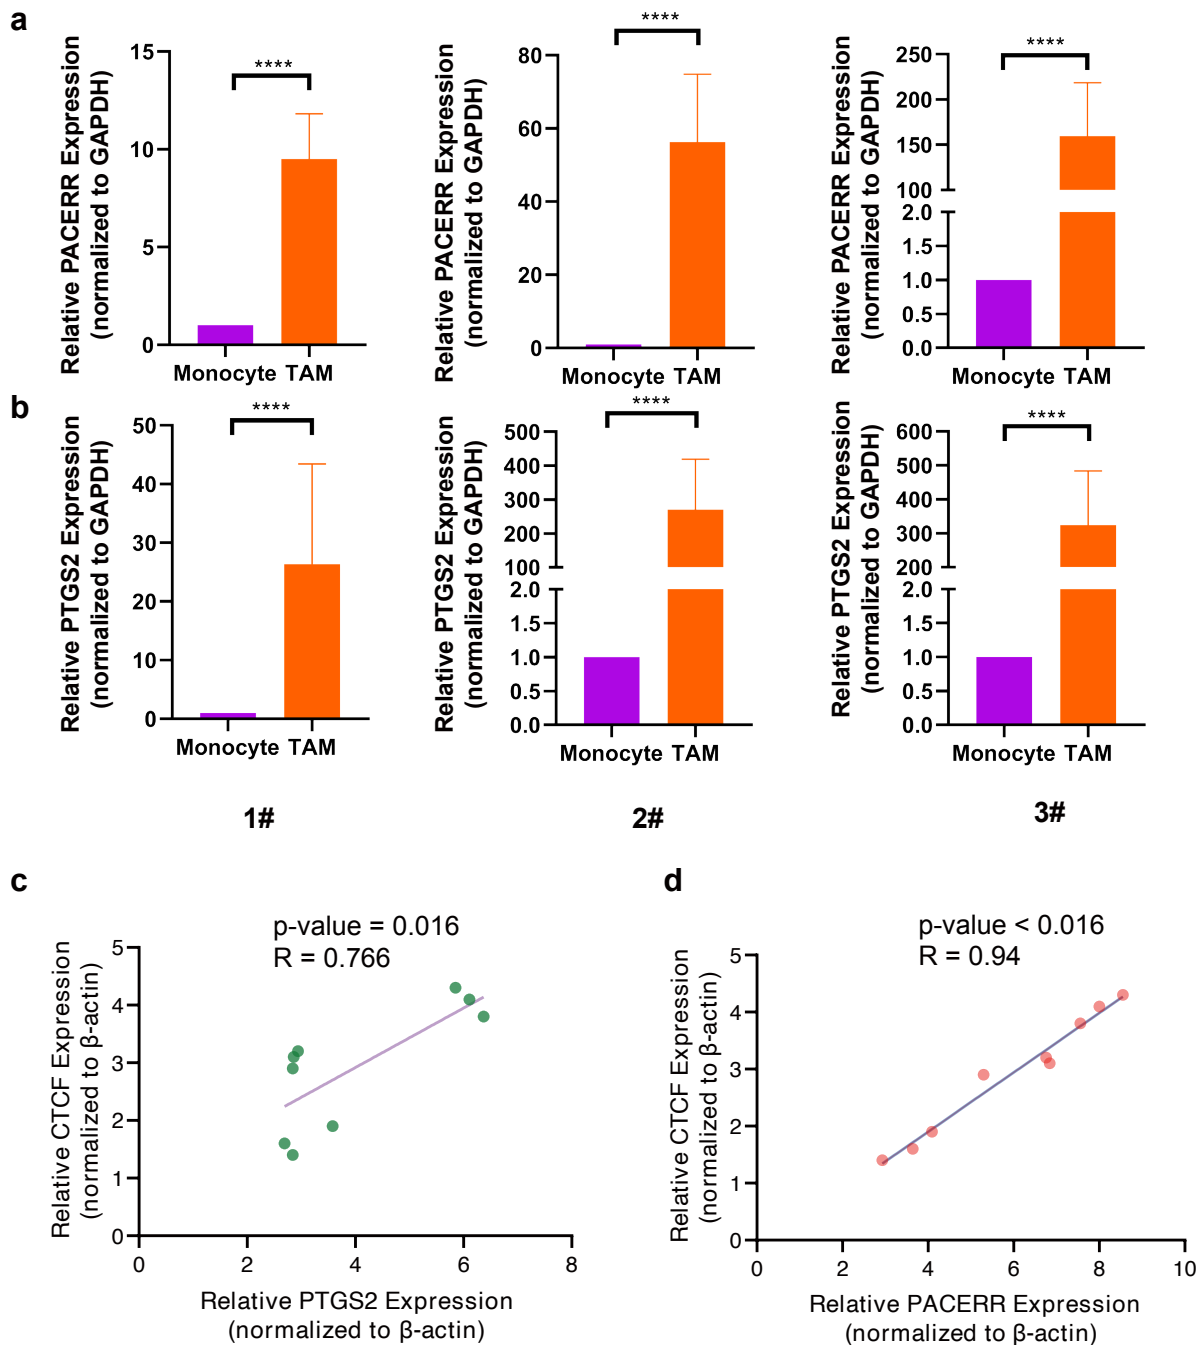

**Figure S14**

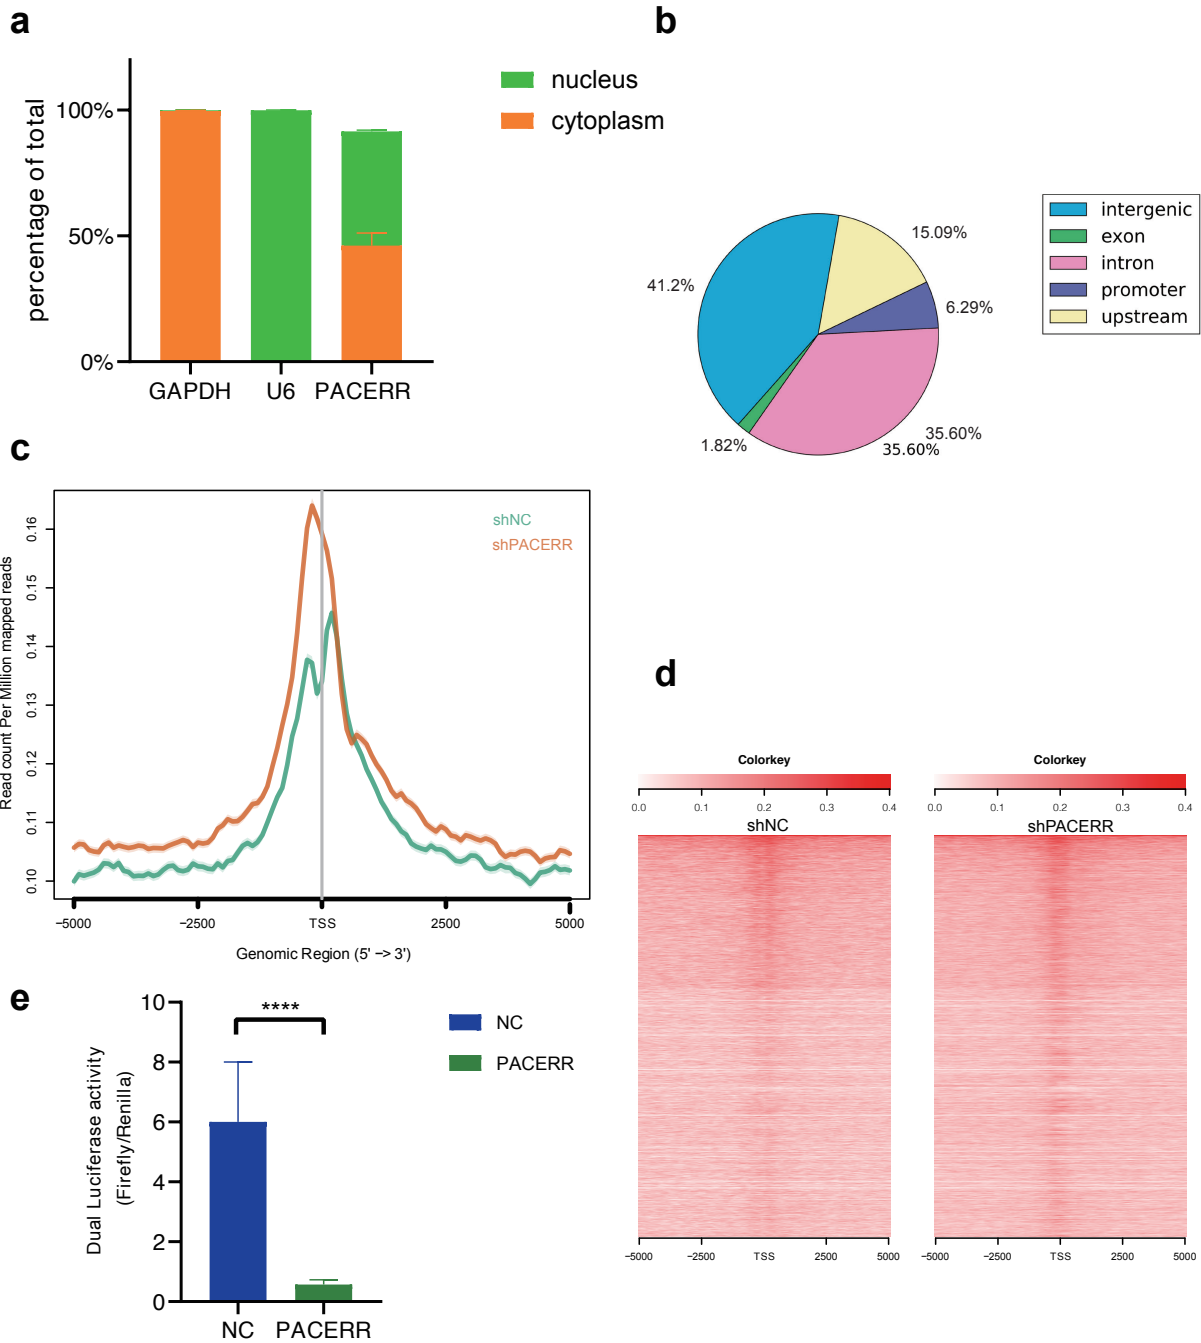

**Figure S15**

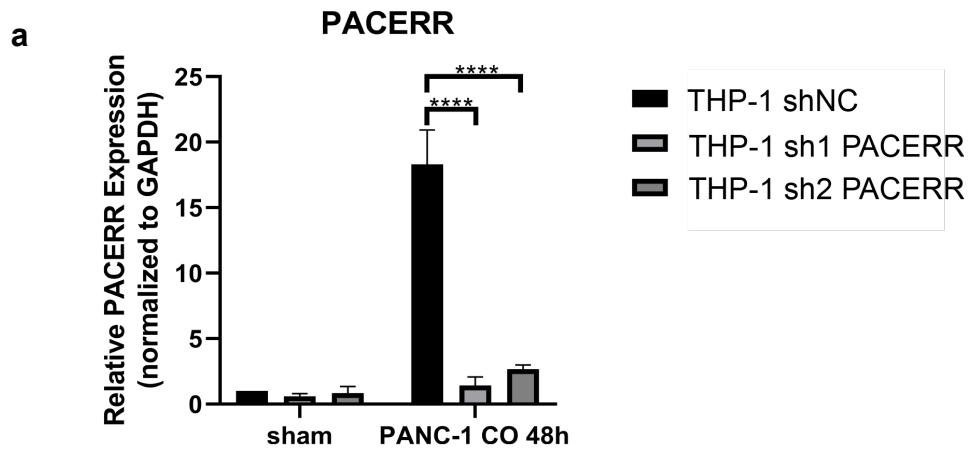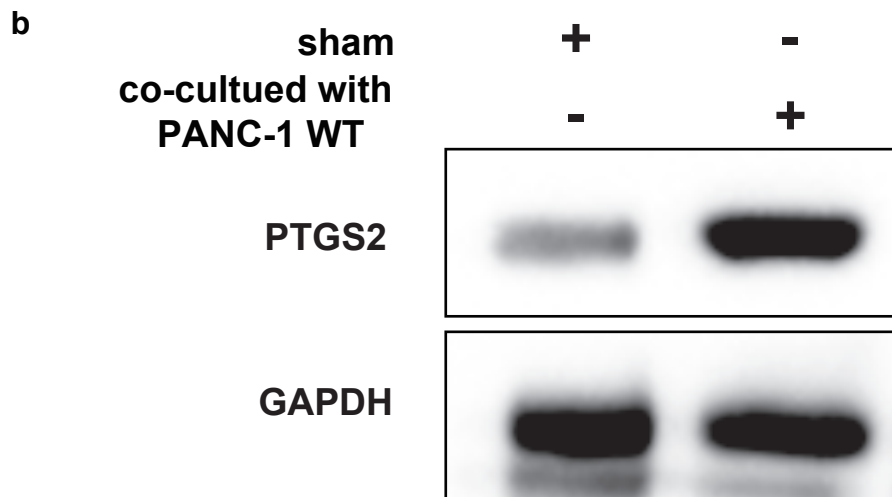

**Figure S16**



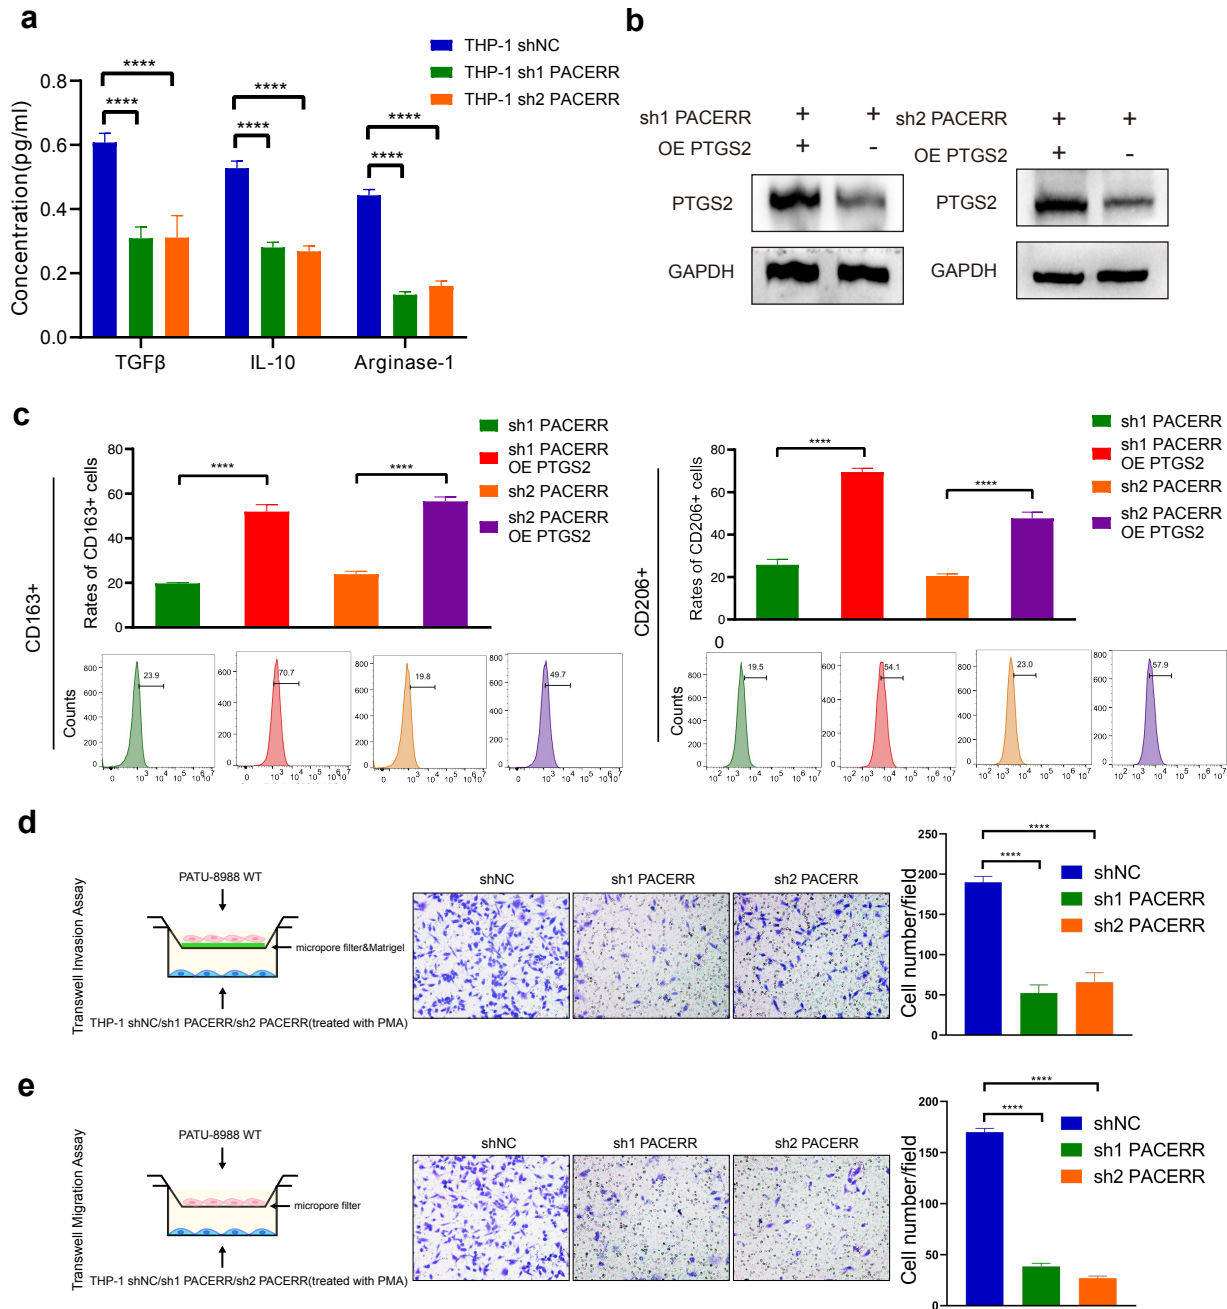

**Figure S17**

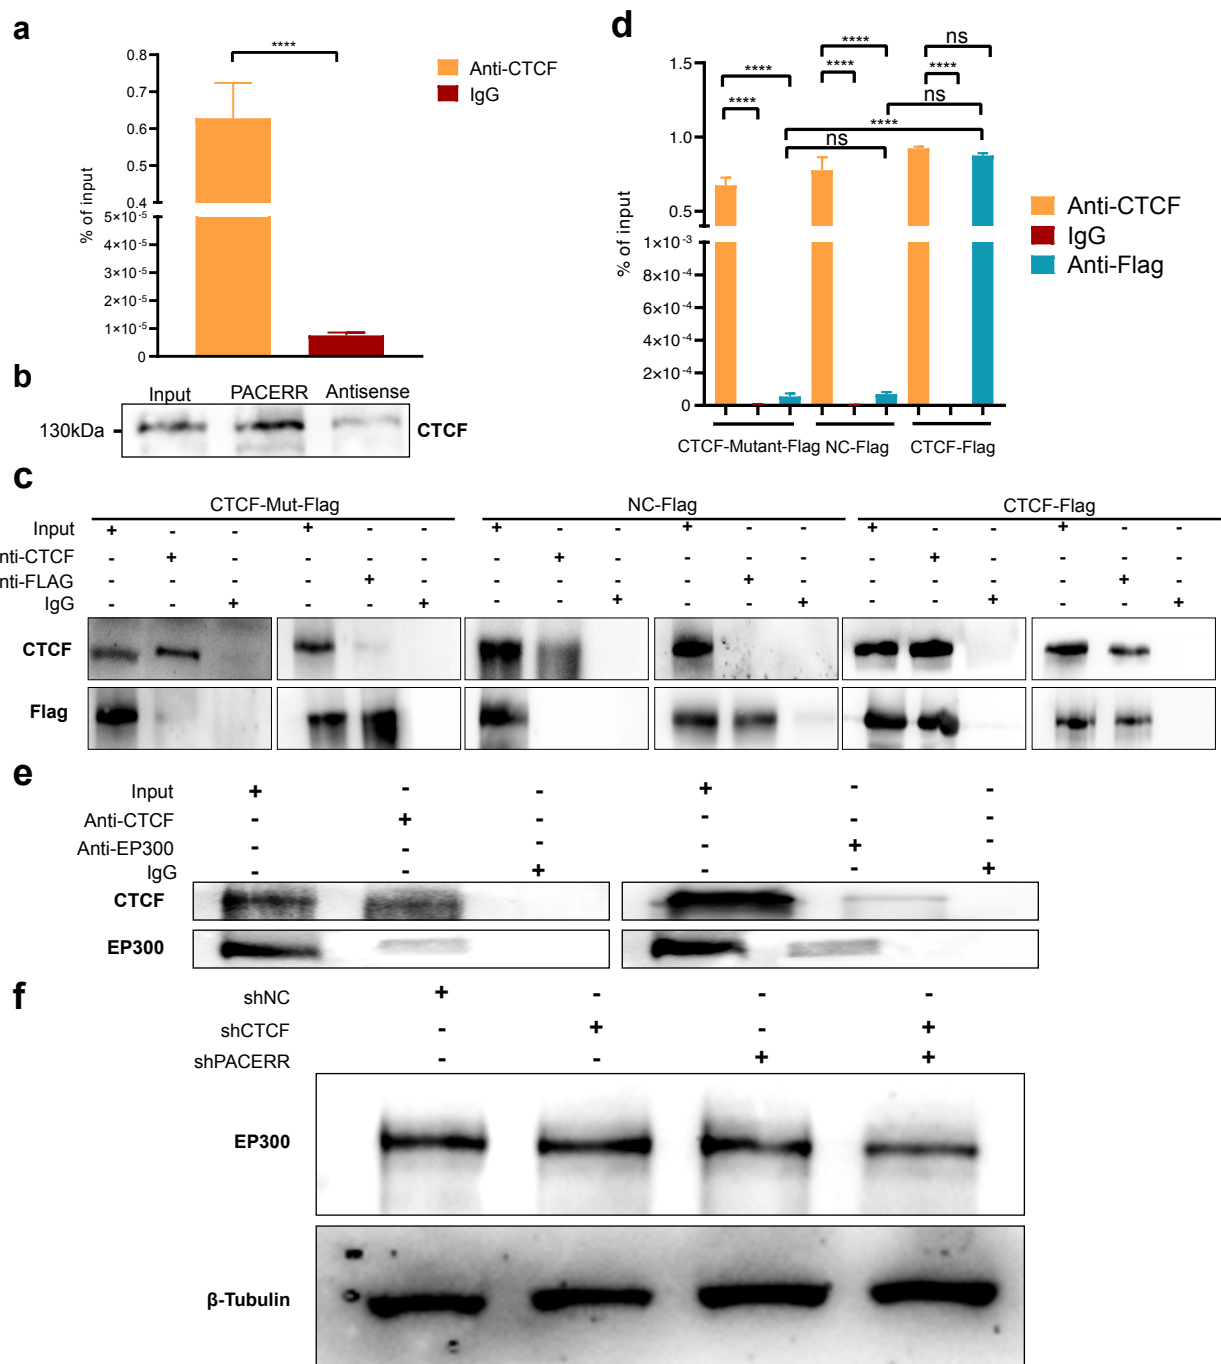

Figure S18

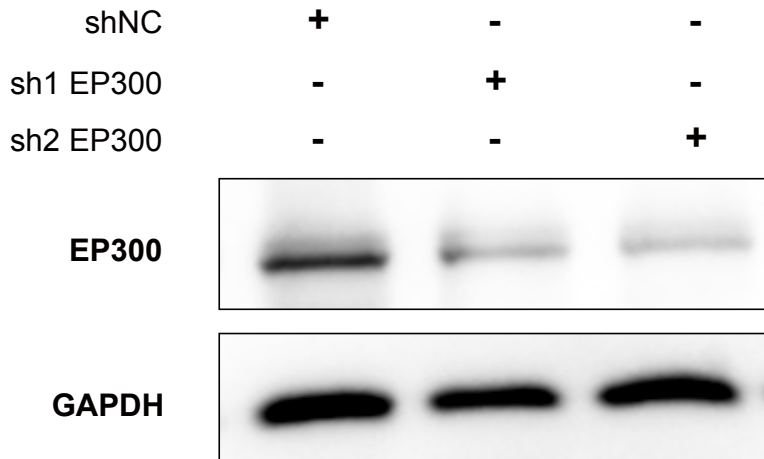

**Figure S19**

**a****INFLAMMATORY\_RESPONSE**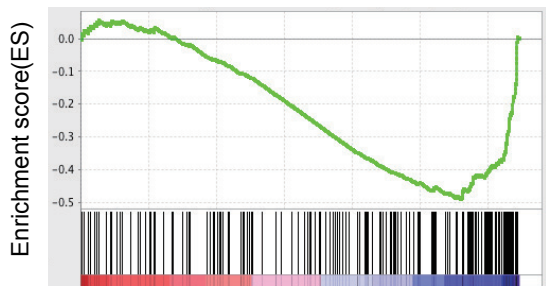

shCTCF

NES=-2.27

shNC

FDR&lt;0.001

**b****INTERFERON\_ALPHA\_RESPONSE**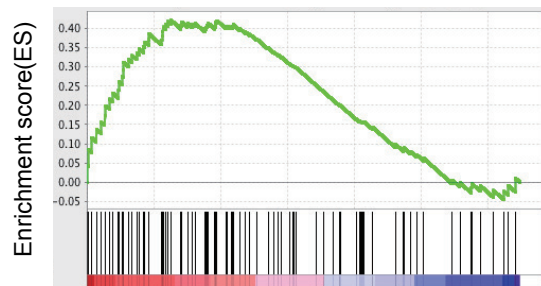

shCTCF

NES=1.498

shNC

FDR=0.049

**c****INTERFERON\_GAMMA\_RESPONSE**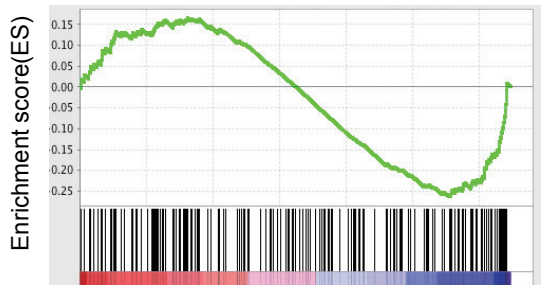

shCTCF

NES=-1.25

shNC

FDR&lt;0.0047

**d****TNFA\_SIGNALING\_VIA\_NFKB**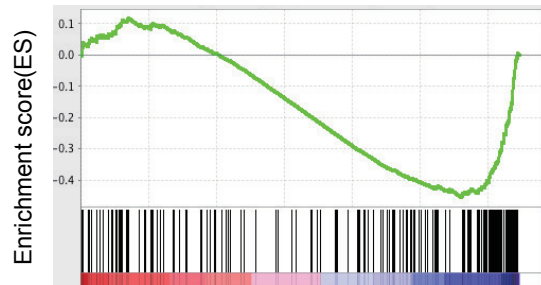

shCTCF

NES=-2.11

shNC

FDR&lt;0.001

**Figure S20**

**a**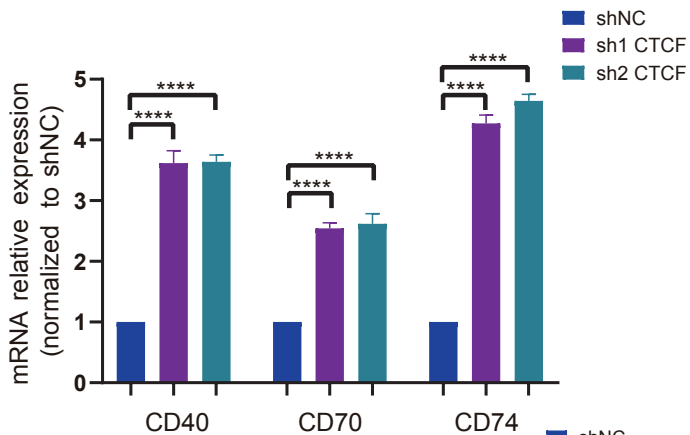**b**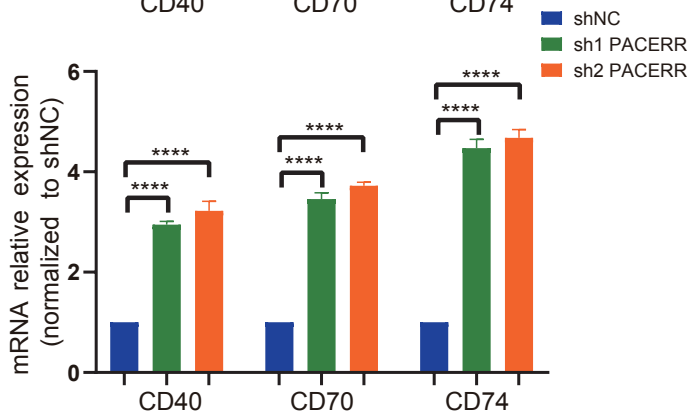**Figure S21**

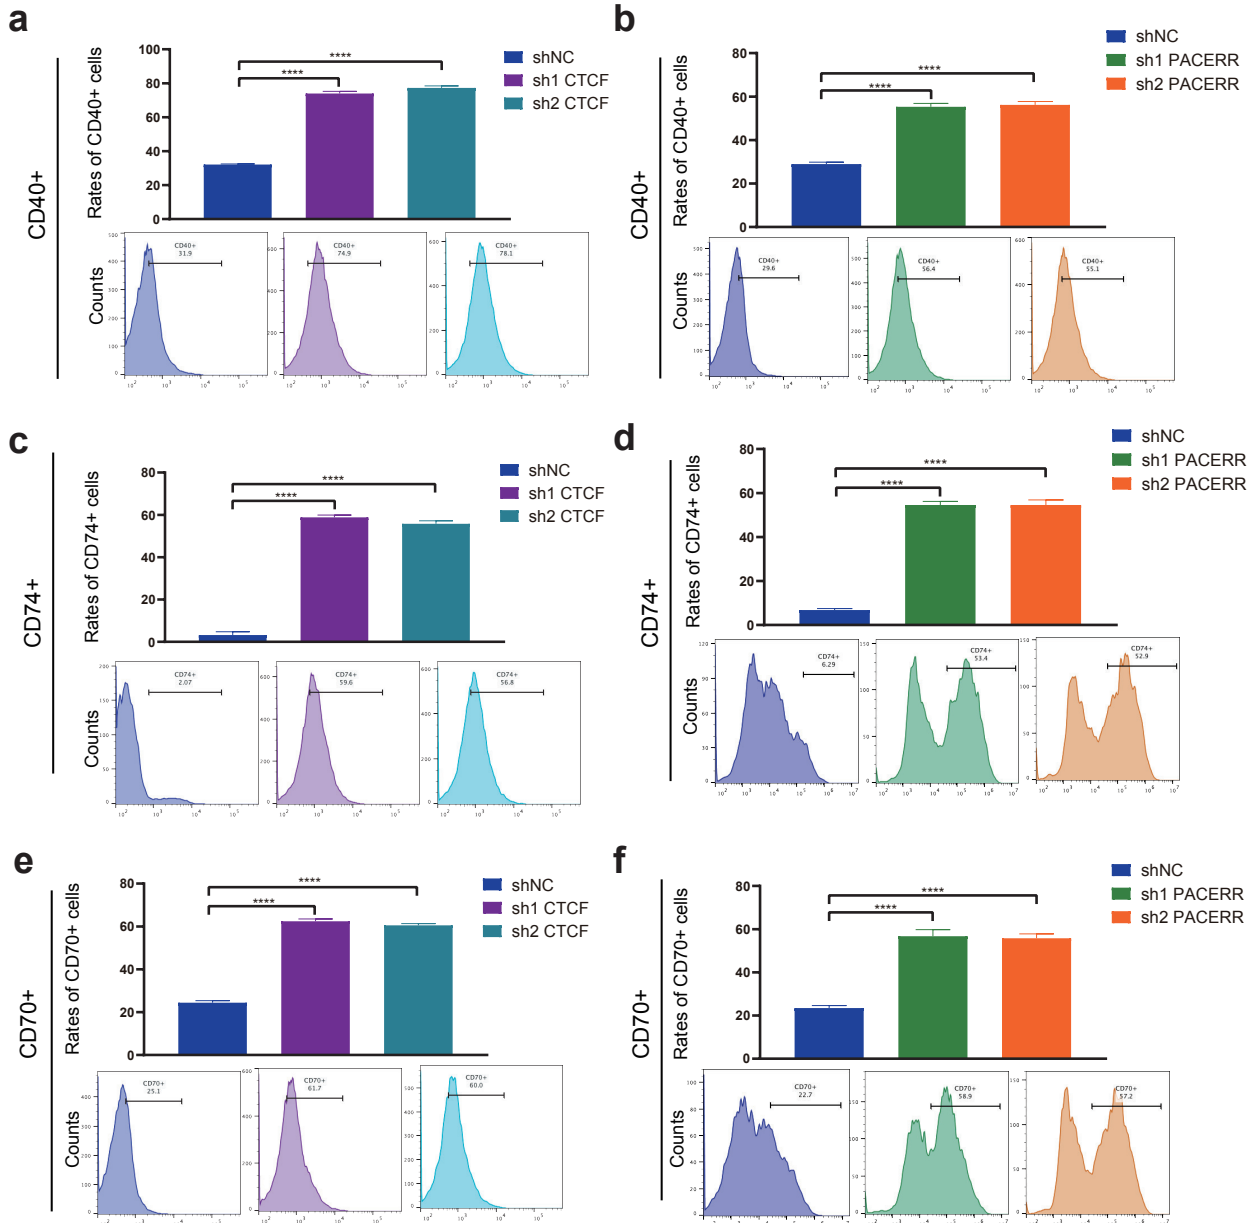

Figure S22
